1 **A genome-wide screen in mice to identify cell-extrinsic regulators of pulmonary**  
2 **metastatic colonisation**

3

4

5 Louise van der Weyden<sup>1\*</sup>, Agnieszka Swiatkowska<sup>1</sup>, Vivek Iyer<sup>1</sup>, Anneliese O. Speak<sup>1</sup>, David J.  
6 Adams<sup>1</sup>

7

8

9 <sup>1</sup>Wellcome Sanger Institute, Wellcome Genome Campus, Hinxton, Cambridge, CB10 1SA,  
10 United Kingdom

11

12

13 \*Corresponding author

14 Louise van der Weyden

15 Experimental Cancer Genetics

16 Wellcome Sanger Institute

17 Wellcome Genome Campus

18 Hinxton

19 Cambridge

20 CB10 1SA

21 United Kingdom

22 Tel: +44-1223-834-244

23 Email: [lvdw@sanger.ac.uk](mailto:lvdw@sanger.ac.uk)

24

25

26 **KEYWORDS:** metastasis, metastatic colonisation, microenvironment, B16-F10, lung, mutant,  
27 mouse.

28

29

30

31

## 32 ABSTRACT

33

34 Metastatic colonisation, whereby a disseminated tumour cell is able to survive and  
35 proliferate at a secondary site, involves both tumour cell-intrinsic and -extrinsic factors. To  
36 identify tumour cell-extrinsic (microenvironmental) factors that regulate the ability of metastatic  
37 tumour cells to effectively colonise a tissue, we performed a genome-wide screen utilising the  
38 experimental metastasis assay on mutant mice. Mutant and wildtype (control) mice were tail  
39 vein-dosed with murine metastatic melanoma B16-F10 cells and 10 days later the number of  
40 pulmonary metastatic colonies were counted. Of the 1,300 genes/genetic locations (1,344  
41 alleles) assessed in the screen 34 genes were determined to significantly regulate pulmonary  
42 metastatic colonisation (15 increased and 19 decreased;  $P < 0.005$  and genotype effect  $< -60$  or  
43  $> +60$ ). Whilst several of these genes have known roles in immune system regulation (*Bach2*,  
44 *Cyba*, *Cybb*, *Cybc1*, *Id2*, *Igh-6*, *Irf1*, *Irf7*, *Ncf1*, *Ncf2*, *Ncf4* and *Pik3cg*) most are involved in a  
45 disparate range of biological processes, ranging from ubiquitination (*Herc1*) to diphthamide  
46 synthesis (*Dph6*) to Rho GTPase-activation (*Arhgap30* and *Fgd4*), with no previous reports of a  
47 role in the regulation of metastasis. Thus, we have identified numerous novel regulators of  
48 pulmonary metastatic colonisation, which may represent potential therapeutic targets.

49

50

## 51 INTRODUCTION

52

53 Metastasis is the spread of cancer cells to a secondary site within the body, and is the  
54 leading cause of death for cancer patients. This multi-step process requires tumour cells to  
55 survive in the circulation ('circulating tumour cells', CTCs), leave the circulation ('extravasate') at  
56 a distant site, survive at this new site ('disseminated tumour cells', DTCs) and eventually  
57 proliferate, thus becoming a clinical problem. Circulating tumour cells can be found in the  
58 patient's blood at the time of diagnosis, and thus it is highly likely that metastasis has already  
59 occurred, especially since surgical excision of a primary tumour does not always prevent  
60 metastasis (Talmadge and Fidler 2010). Indeed, studies have demonstrated that the early steps  
61 of the metastatic process are relatively efficient, with the post-extravasation regulation of tumour  
62 growth ('colonisation') being critical in determining metastatic outcome (Chambers et al. 2001).  
63 Thus, the prevention of metastasis is unlikely to be of therapeutic benefit, and a focus on  
64 preventing the survival of CTCs and/or growth of DTCs would seem a more feasible approach  
65 (Fidler and Kripke 2015).

66 The survival and growth of metastatic cells involves contributions from both tumour cell  
67 intrinsic factors and tumour cell extrinsic factors such as the microenvironment ('host'), which

68 includes stromal cells and the immune system (Quail and Joyce 2013). In recent years there  
69 has been a revolution in our understanding of the role that host factors, such as the immune  
70 system, stroma and vasculature play in the process of cancer progression. This is evidenced by  
71 the development of agents, such as checkpoint inhibitors, that provoke the immune system to  
72 identify and eliminate cancer cells. Importantly, studies in mice have made a significant  
73 contribution to these breakthroughs, such as with the clinically relevant PD-1 (Zago et al.  
74 2016) and CTLA4 receptors (Leach et al. 1996), which were first identified and functionally  
75 characterised using mouse model systems. For this reason we sort to develop a genetic screen  
76 to identify new genes as tumour cell extrinsic regulators of metastatic colonisation.

77 In designing our screen we aimed to, where possible, unbiasedly screen mouse mutants  
78 to identify new genes involved in colonization of the lung, a common site of metastatic seeding  
79 for many tumour types. To this end, we used the 'experimental metastasis assay', which we  
80 have previously demonstrated is a sensitive, robust, and high-throughput method for *in vivo*  
81 quantification of the ability of metastatic tumour cells to colonize a secondary organ (Speak et  
82 al. 2017), to screen mutant mouse lines generated as part of the International Mouse  
83 Phenotyping Consortium (Meehan et al. 2017). In this paper we describe a collection of mutants  
84 identified over 7 years of screening (1,300 mutant mouse lines). This study reveals previously  
85 unappreciated pathways and processes that regulate this biology.

86  
87  
88

## 89 **MATERIALS & METHODS**

90

### 91 **Mice**

92 The mutant mice were generated as part of the International Mouse Phenotyping Consortium  
93 (Meehan et al. 2017), using either targeted embryonic stem cell clones obtained from the  
94 European Conditional Mouse Mutagenesis (EUCOMM) Programme/Knockout Mouse Project  
95 (KOMP)-CSD collection or EUCOMMTools or CRISPR/Cas9 technology to either genetrapped the  
96 target transcript or disrupt a critical exon or to create a point mutation, as detailed previously  
97 (van der Weyden et al. 2017b). The vast majority of lines (>98%) were on the C57BL/6  
98 background, with other strain backgrounds including 129 and FVB (strain-matched control mice  
99 were always used for each mutant line). The care and use of all mice in this study were in  
100 accordance with the Home Office guidelines of the UK and procedures were performed under a  
101 UK Home Office Project licence (PPL 80/2562 or P6B8058B0), which was reviewed and  
102 approved by the Sanger Institute's Animal Welfare and Ethical Review Body. All mice were  
103 housed in individually ventilated cages in a specific pathogen free environment. The diet, cage

104 conditions and room conditions of the mice were as previously reported (van der Weyden et al.  
105 2017a).

### 107 **Cells for tail vein injection**

108 The B16-F10 mouse melanoma cell line was purchased from ATCC (CRL-6475), genetically  
109 validated, and maintained in DMEM with 10% (v/v) fetal calf serum and 2 mM glutamine, 100  
110 U/mL penicillin/streptomycin at 37°C, 5% CO<sub>2</sub>. The cell line was screened for the presence of  
111 mycoplasma and mouse pathogens (at Charles River Laboratories, USA) before culturing and  
112 never cultured for more than five passages.

### 114 **Experimental metastasis assay**

115 B16-F10 (4-5 × 10<sup>5</sup>) cells resuspended in 0.1 mL phosphate buffered saline (PBS) were injected  
116 into the tail vein of 6- to 12-week-old sex-matched syngeneic control and mutant mice. After 10  
117 (± 1) days the mice were humanely sacrificed, their lungs removed and washed in PBS and the  
118 number of metastatic foci counted macroscopically. The use of the experimental assay as a  
119 screen for metastatic colonisation ability has been previously described (Speak et al. 2017).

### 121 **Statistics and bioinformatic analysis**

122 The raw data (number of metastatic foci counted in each mutant mouse relative to the wildtype  
123 controls) from each cohort of mice was subjected to the non-parametric Mann-Whitney U test.  
124 An integrative data analysis (mega-analysis) was performed on the results from all mutant  
125 mouse lines that had been tested in ≥ 3 independent cohorts, and was completed using R  
126 (package nlme version 3.1) as previously described (van der Weyden et al. 2017b). Using the  
127 Mouse Genome Database Informatics (MGI) portal (<http://www.informatics.jax.org>, v6.14), all  
128 1,300 mutant lines screened were separated into unique symbols and annotated with molecular  
129 function using the Gene Ontology (GO) chart tool (Bult et al. 2019) excluding annotations that  
130 were Inferred from Electronic Annotation (IEA). Phenotypic information (MP-to-genotype) was  
131 pulled from MGI using MouseMine (Motenko et al. 2015) and the phenotypes collapsed to the  
132 parental term of the mouse phenotype hierarchy.

### 134 **Data availability Statement**

135 Supplemental files available at FigShare. Table S1 lists the targeted genetic regions that were  
136 mutated in the genetically modified mice used in the screened. Table S2 is the complete data  
137 set (number of metastatic colonies) for all the mice comprising the 1,344 alleles screened  
138 (consisting of 23,975 individual mice). Table S3 explains how to interpret the data for the screen  
139 supplied in Table S2.

140

141

142

143

144

145

## RESULTS

146

147

148

149

150

151

152

153

154

155

156

157

158

159

160

Tail vein injection of mouse melanoma B16-F10 cells primarily results in pulmonary colonisation (due to the capillary beds in the lungs being the first ones encountered by the cells in the arterial blood after leaving the heart). As these cells are pigmented (melanin granules) their colonisation of the lungs can be determined by macroscopic counting of the number of black metastatic foci on the lungs (**Figure 1A**). Sex- and age-matched wildtype mice were concomitantly dosed with the cohorts of mutant mice (**Figure 1B**), and the results from mutant mice were only compared to the wildtype mice dosed at the same time (due to day-to-day variations in the assay, and factors such as sex and age of the mice affecting metastatic burden (Speak et al. 2017)). A ‘metastatic ratio’ (MR) was determined for each mutant mouse line, which was calculated as the average number of metastatic colonies for the mutant line relative to the average number of metastatic colonies for concomitantly dosed wildtype mice. If a mutant mouse line showed a MR of  $<0.6$  or  $>1.4$  (and Mann-Whitney  $P < 0.05$ ), additional cohorts were assayed ( $n \geq 2$ , assayed on independent days). An integrative data analysis (IDA) was performed on the whole dataset and those with  $P < 0.005$  (Hochberg) and a biological effect (‘genotype effect’) of  $\leq -55$  or  $\geq +55$  were classified as ‘hits’. A biological filter was applied as we were only interested in determining robust (strong) regulators of metastatic colonisation.

161

162

163

164

165

166

167

168

169

170

171

172

173

174

175

176

We used *Entpd1* and *Hsp90aa1* mutant mice as positive controls, as the literature suggested they should show altered metastatic burden. *Entpd1* (*ectonucleoside triphosphate diphosphohydrolase 1*) encodes the plasma membrane protein CD39. The enzymatic activity of CD39 (NTPDase I), together with CD73 (ecto-5'-nucleotidase), result in the phosphohydrolysis of extracellular ATP into adenosine, which acts as an immunosuppressive pathway through the activation of adenosine receptors (Stagg and Smyth 2010). *Entpd1*-deficient mice that were administered B16-F10 mouse melanoma cells and MC-38 mouse colon cancer cells via the hepatic portal vein (experimental metastasis assay) were found to develop significantly fewer hepatic metastases than wildtype (control) mice (Sun et al. 2010). In agreement with this, we found that *Entpd1* mutant mice showed significantly reduced numbers of pulmonary metastatic colonies after tail vein dosing with B16-F10 cells, relative to wildtype mice. *Hsp90aa1* (*heat shock protein 90 alpha family class A member 1*) encodes a molecular chaperone that functions to aids in the proper folding of specific target proteins (“clients”), including numerous kinases, transcription factors and steroid hormone receptors (Li et al. 2012). Systemic administration of a mitochondrial-targeted, small-molecule Hsp90 inhibitor (Gamitrinib) to Transgenic Adenocarcinoma of the Mouse Prostate (TRAMP) mice inhibited the formation of localised

177 prostate tumours, as well as the spread of metastatic prostate cancer to abdominal lymph nodes  
178 and liver (Kang et al. 2011). In agreement with this, we found that *Hsp90aa1* mutant mice  
179 showed significantly reduced numbers of pulmonary metastatic colonies after tail vein dosing  
180 with B16-F10 cells, relative to wildtype mice. Both *Entpd1* and *Hsp90aa1* were classified as  
181 'hits' using the integrated data analysis (IDA) approach, thus we were confident that our  
182 screening methodology was robust.

183 We have previously published the results of screening 810 mutant mouse lines and  
184 showed that endothelial SPNS2 can regulate metastatic colonisation by sphingosine-1-  
185 phosphate (S1P)-mediated control of lymphocyte trafficking (van der Weyden et al. 2017a; van  
186 der Weyden et al. 2017b). Here we have included an additional 490 mutant mouse lines, to  
187 make a total of 1,300 mutant mouse lines (1,344 alleles) screened. The mutant mouse lines  
188 were randomly selected and the genes (**Table S1**) cover a diverse range of molecular functions  
189 (**Figure 2a**) and are involved in many different biological processes (**Figure 2b**). Of the 1,300  
190 mutant mouse lines screened, 1,247 lines (96%) carried alleles that targeted single protein  
191 coding genes, with the other alleles targeting lncRNAs (21 lines), miRNAs (8 lines), CpG islands  
192 (13 lines), pseudogenes (3 lines), complexes/clusters/regions (3 lines), multiple protein coding  
193 genes (3 lines) or gene segments (2 lines). The raw data for each individual mouse (number of  
194 metastases counted) is listed in **Table S2**. The mutant mice tested were predominantly  
195 homozygotes (880 lines, 68%), with heterozygotes generally only being tested (356 lines, 27%)  
196 if the line was lethal or sub-viable (i.e., where 0 or  $\leq 13\%$  of homozygote offspring were obtained  
197 from heterozygous intercrosses, respectively) and in a small number of cases both  
198 heterozygotes and homozygotes were assessed (64 lines, 5%). An IDA was performed on the  
199 data from the 256 mouse lines that showed evidence of a phenotype in initial screening and for  
200 which at least 3 independent cohorts were tested, and the 34 mutant lines classified as 'hits' are  
201 shown **Table 1**.

## 202 203 **DISCUSSION**

204  
205 We have characterised the mechanism of action for several genes that showed a  
206 decreased metastatic colonisation phenotype in our screen, specifically *Spns2* (van der Weyden  
207 et al. 2017a), *Nbeal2* (Guerrero et al. 2014), *Cybc1* (Thomas et al. 2017) and the 5 members of  
208 the NOX2 complex (van der Weyden et al. 2018). These genes regulate pulmonary metastatic  
209 colonisation primarily by impacting on the function of the haematopoietic/immune system  
210 (lymphocytes, granulocytes/monocytes and platelets). In addition, *Bach2* was also a 'hit' in our  
211 screen, showing decreased metastatic colonisation, and *Bach2* is a key regulator of CD4<sup>+</sup> T-cell  
212 differentiation (Roychoudhuri et al. 2013), with *Bach2* mutant mice recently being shown to have



213 increased CD8<sup>+</sup> T-cell cytotoxic activity (Abeler-Dorner et al. 2020). Indeed, phenotypic analysis  
214 of the 34 metastatic colonisation regulating genes detailed in this study show a strong  
215 enrichment for genes involved in immune/haematopoietic system development and function with  
216 phenotypes in those categories representing 88% of all the reported phenotypes associated  
217 with those genes.

218 As we have previously predominantly focussed our attention genes positively regulating  
219 metastatic colonisation (i.e., mutant mice showing decreased metastasis), we will now turn our  
220 focus to discussing negative regulators of metastatic colonisation (i.e., mutant mice showing  
221 increased metastasis).

## 223 ***Duoxa2***

224 The strongest biological phenotype we observed, in terms of increased numbers of  
225 pulmonary metastatic colonies relative to controls, was with *Duoxa2* mutant mice. The *Dual*  
226 *oxidase maturation factor 2 (DUOXA2)* gene encodes an endoplasmic reticulum protein that is  
227 necessary for the maturation and cellular localization (transport from the endoplasmic reticulum  
228 to the plasma membrane) of dual oxidase 2 (DUOX2) (Grasberger and Refetoff 2006). The  
229 NADPH oxidases, DUOX1 and DUOX2, are critical for the production of extracellular hydrogen  
230 peroxide that is required for thyroperoxidase-mediated thyroid hormone synthesis in the thyroid  
231 gland; as a result, mutations in DUOX and/or DUOXA2 result in thyroid dysmorphogenesis and  
232 congenital hypothyroidism (De Deken and Miot 2019). Indeed, *Duoxa2* mutant mice were  
233 significantly smaller than their wildtype or heterozygous littermates. A smaller body size (and  
234 thus total blood volume) undoubtedly contributed to the increased pulmonary metastatic burden  
235 we observed, as well as the presence of extrapulmonary metastases (bone marrow, liver,  
236 kidney). However, it was recently shown that *Duoxa2* mutant mice have alterations in key  
237 immune cell subsets (CD4<sup>+</sup> T-cells, neutrophils, monocytes and NK cells) (Abeler-Dorner et al.  
238 2020), which could also account for their increased metastatic colonisation. Thus, generation of  
239 an inducible *Duoxa2* mutant mouse, wherein *Duoxa2* could be deleted in an adult mouse, will  
240 be required to disentangle any effects that loss of DUOXA2 may be having on metastatic  
241 colonisation aside from a smaller body size.

## 243 ***Rnf10***

244 The *Ring finger protein 10 (Rnf10)* gene encodes a protein with a ring finger motif (a C3HC4-  
245 type zinc finger). *Rnf10/RNF10* has been shown to be important for key neurobiology functions,  
246 including myelin formation (Hoshikawa et al. 2008), neuronal cell differentiation (Malik et al.  
247 2013) and synaptonuclear messaging (Carrano et al. 2019). It has also been reported to play a  
248 role in vascular restenosis (Li et al. 2019) and a SNP in *RNF10* has been associated with

249 adiposity and type 2 diabetes (Huang et al. 2014). We found that *Rnf10*-deficient mice showed  
250 increased pulmonary metastatic colonisation, with males having a consistently higher metastatic  
251 burden than females ( $290 \pm 26$  versus  $153 \pm 31$ , respectively); this is the only mutant line in  
252 which we observed a sexually dimorphic effect. Further investigations are required to provide  
253 mechanistic insight as to how *Rnf10* may be regulating metastatic colonisation, and why it has a  
254 stronger effect in males.

255

### 256 ***Slc9a3r2***

257 The *Slc9a3r2* (*SLC9A3 regulator 2*) gene encodes a member of the Na(+)/H(+)  
258 exchanger regulatory factor (NHERF) family of PDZ scaffolding proteins. All NHERF proteins  
259 are involved with anchoring membrane proteins that contain PDZ recognition motifs to form  
260 multiprotein signalling complexes. SLC9A3R2 (also known as NHERF2) has been shown to  
261 form complexes with a diverse range of proteins depending on tissue context, including  
262 complexing with the lysophosphatidic acid (LPA) receptor and the epithelial anion channel,  
263 cystic fibrosis transmembrane conductance regulator (CFTR) in airway and gut epithelia (Zhang  
264 et al. 2017), the P2Y1 nucleotide and mGluR5 glutamate receptors to different ion channels in  
265 neurons (Filippov et al. 2010) and megalin and CIC-5 in proximal tubule cells (Hryciw et al.  
266 2012). However, it is not yet clear how loss of *Slc9a3r* results in increased metastatic  
267 colonisation.

268

### 269 ***Ankhd1* and *Fzd6***

270 The *Ankhd1* (ANKHD1 ankyrin repeat and KH domain containing 1) gene encodes a  
271 protein with multiple ankyrin repeat domains and a single KH-domain. ANKHD1 is the  
272 mammalian homolog of *Mask1* in *Drosophila* (which is required for the activity of the Hippo  
273 pathway effector, Yorkie) and promotes YAP1 activation and cell cycle progression (Machado-  
274 Neto et al. 2014). Studies have demonstrated a role for ANKHD1 in promoting cell cycle  
275 progression/proliferation in renal cancer, multiple myeloma cell and prostate cancer cells  
276 (Dhyani et al. 2012; Machado-Neto et al. 2014; Fragiadaki and Zeidler 2018) and in promoting  
277 hepatocellular carcinoma metastasis (Zhou et al. 2019). The *Fzd6* (frizzled class receptor 6)  
278 gene is a member of the 'frizzled' gene family, which encode 7-transmembrane domain proteins  
279 that are receptors for Wnt signaling proteins. FDZ6 has a known role in non-canonical  
280 WNT/PCP signalling in cancer (Corda and Sala 2017), including mediating transformation,  
281 increased invasiveness of tumour cells and metastasis (Cantilena et al. 2011; Corda and Sala  
282 2017; Corda et al. 2017). In agreement with this, increased expression of FDZ6 has reported in  
283 many cancer types, and correlates with poor prognosis in patients with breast, brain and  
284 oesophageal cancer (Corda et al. 2017; Huang et al. 2016; Zhang et al. 2019). Thus, both



285 *Ankhd1* and *Fzd6* have well-characterised tumour cell-intrinsic roles, however, how they  
286 mediate their role in regulating tumour cell extrinsic metastasis is not clear.

287

### 288 ***Regulation of the immune system***

289 Five genes with known roles in regulating immune cell function were identified; the  
290 immune cell types included NK cells, lymphocytes (T- and B-cells) and  
291 granulocytes/macrophages, which have all been shown to play critical roles in regulating  
292 metastasis (reviewed in (Blomberg et al. 2018)). Thus genes that interfere with their production,  
293 maturation and/or function could understandably result in increased levels of metastatic  
294 colonisation.

295 *Irf1*: The *Interferon regulatory factor 1 (IRF1)* gene encodes a transcription factor that is  
296 one of 9 members of the interferon regulatory transcription factor (IRF) family. IRF1 stimulates  
297 both innate and acquired immune responses through the activation of specific target genes, by  
298 regulating target genes through binding to an interferon-stimulated response element (ISRE) in  
299 their promoters and inducing either transcriptional activation or repression (Ikushima et al.  
300 2013). *Irf1* null mice are immunodeficient, characterised by a marked reduction in CD8<sup>+</sup> T cells  
301 (Penninger et al. 1997) and a decrease in NK cell numbers with associated impaired cytolytic  
302 activity (Taki et al. 1997).

303 *Irf7*: The *Interferon regulatory factor 7 (IRF7)* gene is another member of the IRF family  
304 and plays a critical role in the innate immune response against viruses. *Irf7*-null mice are highly  
305 susceptible to H1N1 infection (Wilk et al. 2015) and secrete decreased levels of IFN- $\alpha/\beta$  in  
306 response to stimulation (Honda et al. 2005).

307 *Id2*: The *ID2 (inhibitor of DNA binding 2)* gene encodes a helix-loop-helix-containing  
308 protein that lacks a DNA-binding domain and is one of the four members of the ID family (ID1–  
309 ID4). ID proteins dimerise with E protein, RB and Ets transcription factors, preventing the  
310 formation of DNA-binding transcription complexes. *Id2* null mice show a greatly reduced  
311 population of natural killer (NK) cells, as *Id2* plays a role in NK cell maturation (Yokota et al.  
312 1999; Boos et al. 2007).

313 *Igh-6*: The *IGH-6 (immunoglobulin heavy constant mu)* gene encodes a protein that is  
314 important for the production of the heavy chain of IgM antibodies and maturation of pre-B cells,  
315 the precursors of B-lymphocytes. *Igh-6* null mice are B-cell-deficient, with their development  
316 arrested at the stage of pre-B-cell maturation (Kitamura et al. 1991). *Igh-6*<sup>-/-</sup> mice also show  
317 impaired Th1 T-cell responses to Salmonella antigens/infections (Mastroeni et al. 2000;  
318 Ugrinovic et al. 2003) demonstrating a role for B cells in the establishment and/or persistence of  
319 a stable T-cell memory pool.

320 *Pik3cg*: The *PIK3CG* (*phosphatidylinositol-4,5-bisphosphate 3-kinase catalytic subunit*  
321 *gamma*) gene, encodes a class I catalytic subunit of phosphoinositide 3-kinase (PI3K), known  
322 by many names, including p110- $\gamma$  and PI3K $\gamma$ . Like other class I catalytic subunits (p110- $\alpha$ ,  
323 p110- $\beta$ , and p110- $\delta$ ), p110- $\gamma$  binds a p85 regulatory subunit to form PI3K, which phosphorylate  
324 inositol lipids and is involved in the immune response. p110- $\gamma$  is highly expressed in leukocytes  
325 and is important for restraining inflammation and promoting appropriate adaptive immune  
326 responses in both humans and mice (Takeda et al. 2019). *p110- $\gamma$*  null mice show defective  
327 thymocyte development and T cell activation, as well as neutrophil migration and oxidative burst  
328 (Sasaki et al. 2000).

### 330 **Protein modification**

331 A number of genes encoding protein modifiers were identified; these included a ubiquitin-  
332 related protein, a serine hydrolase and a protein involved in amidation. How the targets of these  
333 proteins can regulate metastatic colonisation is still unclear.

334 *Herc1*: The *HERC1* (*HECT and RLD domain containing E3 ubiquitin protein ligase family*  
335 *member 1*) gene encodes an E3 ubiquitin ligase protein. In humans, six *HERC* genes have been  
336 reported which encode two subgroups of HERC proteins: large (HERC1-2) and small (HERC3-  
337 6). The HERC1 protein was the first to be identified and has been found to play numerous roles,  
338 including membrane trafficking, protein stability and DNA damage repair, through its interactions  
339 with clathrin, TSC2 and pyruvate kinase (M2 isoform), respectively (reviewed in (Garcia-Cano et  
340 al. 2019)). *Tambaleante* (*tbl*) mice, which carry a spontaneous missense mutation in *Herc1*,  
341 show neurological phenotypes including, Purkinje cell degeneration, hind limb clasping and  
342 impaired rotarod performance (Mashimo et al. 2009). Whilst mutations/loss of *HERC1*  
343 expression have been reported in some cancers (reviewed in (Garcia-Cano et al. 2019)), it is  
344 not clear how tumour cell-extrinsic loss of *Herc1* resulted in increased metastatic colonisation.

345 *Abhd17a*: The *ABHD17A* (*abhydrolase domain containing 17A*) gene encodes a member  
346 of the ABHD17 family of proteins that are membrane-anchored serine hydrolases which can  
347 accelerate palmitate turnover on PSD-95 and N-Ras. The catalytic activity of ABHD17 proteins  
348 are required for N-Ras depalmitoylation and re-localization to internal cellular membranes (Lin  
349 and Conibear 2015) and ABHD17 proteins finely control the amount of synaptic PSD-95 by  
350 regulating PSD-95 palmitoylation cycles in neurons (Yokoi et al. 2016). More recently, regulation  
351 of the palmitoylation status of the transcription factor TEAD, which is depalmitoylated by  
352 ABHD17A, has been suggested to be a potential target for controlling TEAD-dependent  
353 processes, including cancer cell growth (Kim and Gumbiner 2019).

354 *Dph6*: The *Dph6* (*diphthamine biosynthesis 6*) gene encodes protein that is required for  
355 the amidation step of the diphthamide pathway in yeast. Diphthamide is a highly modified

356 histidine residue in eukaryotic translation elongation factor 2 (eEF2) and diphthamide synthesis  
357 is required for optimal translational accuracy and cell growth (Uthman et al. 2013). In  
358 eukaryotes, the formation of diphthamide involves a conserved biosynthetic pathway involving 7  
359 members, DPH1-7 that has been predominantly studied in yeast (reviewed in (Schaffrath et al.  
360 2014)). However, they do play an import role in mammalian cells as *Dph1* null mice display  
361 multiple developmental defects that parallel Miller-Dieker syndrome (MDS) (Yu et al. 2014),  
362 associated with deletions on chromosome 17p13.3, *Dph3* null mice are embryonically lethal (Liu  
363 et al. 2006) and *Dnajc24* (*Dph4*) null mice almost always die before birth with the few that do  
364 survive showing severe developmental defects reminiscent of *Dph1* null mice (Webb et al.  
365 2008). Recently, *Dph6* mutant mice were shown to have an immune phenotype with alterations  
366 in many innate and adaptive cell lineages (Abeler-Dorner et al. 2020), and it is possible that  
367 these may be affecting metastatic colonisation. Thus, as very little is known about ABHD17A  
368 and DPH6 in the context of cancer, it is difficult to precisely speculate how they may be playing  
369 a role in tumour cell extrinsic regulation of metastatic colonisation.

370

### 371 **Rho GTPase regulating proteins**

372 Rho GTPases are molecular switches that control a wide variety of signal-transduction  
373 pathways, including regulation of the cytoskeleton, migration, and proliferation. Rho GTPases  
374 can be regulated by GTPase-activating proteins (GAPs) and Rho GDP/GTP nucleotide  
375 exchange factors (Rho GEFs). We identified one of each of these family members.

376 *Arhgap30*: The *ARHGAP30* (*Rho GTPase activating protein 30*) gene encodes a Rho  
377 GTPase-activating protein, with a role in regulating cell adhesion (Naji et al. 2011), as well as  
378 suppressing lung cancer cell proliferation, migration and invasion (Mao and Tong 2018). In  
379 colorectal cancer (CRC), ARHGAP30 levels correlate with p53 acetylation and functional  
380 activation (Wang et al. 2014), and ARHGAP30 has been proposed as a prognostic marker for  
381 CRC (Wang et al. 2014), early-stage pancreatic ductal adenocarcinoma (Liao et al. 2017) and  
382 lung adenocarcinoma (Li et al. 2018).

383 *Fgd4*: The *FDG4* (*FYVE, RhoGEF And PH Domain Containing 4*) gene encodes a GEF  
384 specific to the Rho GTPase, CDC42. FDG4, also known as FRABIN, contains an actin filament-  
385 binding domain (ABD), an Dbl homology domain (DHD), a cysteine rich-domain (CRD), and two  
386 pleckstrin homology domains (PHD), which are involved in binding to the actin and activating  
387 CDC42 at that vicinity, resulting in actin cytoskeleton reorganization (allowing for shape  
388 changes such as the formation of filopodia and lamellipodia) (Nakanishi and Takai 2008). FDG4  
389 overexpression has been observed in pancreatic neuroendocrine neoplasms (Shahid et al.  
390 2019) and expression of FDG4 positively correlates with the aggressive phenotype of prostate  
391 cancer (Bossan et al. 2018). Mutations in this gene can cause Charcot-Marie-Tooth (CMT)

392 disease type 4H (CMT4H), characterised by heterogeneous hereditary motor and sensory  
393 neuropathies as a result of demyelination of peripheral nerves (Delague et al. 2007).

394 Although much is known about these two genes and they have well established roles in  
395 tumour cell-intrinsic roles in cancer, it is not clear at this stage how they may be mediating an  
396 increased metastatic colonisation phenotype.

## 398 CONCLUSION

400 In summary, we have used the experimental metastasis assay to screen 1,300 mutant  
401 mouse lines to identify novel host/microenvironmental regulators of metastatic colonisation. We  
402 have identified 34 genes whose loss of expression results in either an increased or decreased  
403 ability for mouse melanoma cells to undergo metastatic colonisation of the lung following tail  
404 vein injection. Some of these genes regulate key pathways in immune cell development or  
405 function, however many have only been shown to play a role in tumour cell-intrinsic pathways  
406 with no known tumour cell-extrinsic functions reported, thus, we have identified numerous novel  
407 regulators of pulmonary metastatic colonisation, which could represent potential therapeutic  
408 targets.

## 411 ACKNOWLEDGEMENTS

412 We thank the Mouse pipeline teams and the Research Support Facility staff at the Wellcome  
413 Sanger Institute for the generation, genotyping and care of the mice used in this study. This  
414 work was funded by the Wellcome Trust (awarded to D.J.A.).

## 417 AUTHOR CONTRIBUTIONS

418 L.v.d.W, A.O.S and D.J.A conceived the experiments and led the work. L.v.d.W, A.S., V.I. and  
419 A.O.S performed the experiments and interpreted the data. L.v.d.W. wrote the manuscript and  
420 all authors critically reviewed the manuscript and approved the final version.

## 423 FIGURE LEGEND

424 **Figure 1.** The metastatic colonisation assay. (A) Representative macroscopic image of lungs  
425 from wildtype (+/+) and mutant (*Tbc1d22a*<sup>tm1b/tm1b</sup> and *Rnf10*<sup>tm1b/tm1b</sup>) mice 10 days after tail vein  
426 dosing with B16-F10 melanoma cells, demonstrating examples of decreased and increased  
427 metastatic colonisation, respectively. (B) Schematic of the B16-F10 pulmonary metastasis

428 screen, showing that a cohort of mice consists of wildtype mice and groups of different mutant  
429 mice, all of which are tail vein dosed with the B16-F10 melanoma cells, and then the number of  
430 pulmonary metastatic colonies counted 10 days later (the 'metastatic ratio' of a mutant line is  
431 derived by dividing the average of the metastases for a mutant group by the average number of  
432 metastases for the wildtype group).

433  
434 **Figure 2.** Gene Ontology annotation of the 1,300 mutant mouse lines screened as detailed in  
435 Methods. A) Molecular functions of genes screened and B) Biological processes of genes  
436 screened.

## 439 SUPPLEMENTARY DATA

440  
441 **Table S1. A list of the targeted genetic regions that were mutated in the genetically**  
442 **modified mice used in the screened.** The name, feature type and chromosomal location is  
443 listed for all the genes/ genetic locations that were targeted in the mutant mice screened.  
444 'Feature type' is as defined at  
445 [http://www.informatics.jax.org/userhelp/GENE\\_feature\\_types\\_help.shtml](http://www.informatics.jax.org/userhelp/GENE_feature_types_help.shtml). The 'current symbol'  
446 is the most recent name for the gene/genetic region (as on some occasions the name has been  
447 changed at MGI since the mouse line was originally screened).

448  
449 **Table S2. Complete data set for all the mice comprising the 1,344 alleles screened.**  
450 Results of the B16-F10 pulmonary metastasis screen for the 1,344 alleles consisting of 23,975  
451 individual mice. There are a number of meta-data (such as sex, genetic background, assay  
452 date, zygosity, gene, cell number used and QC notes) that should be considered in any  
453 analysis. Details of how to interpret the data are explained in Table S3.

454  
455 **Table S3. Explanation of how to interpret the data for the screen.** An explanation of the  
456 data format, data options and other relevant information to allow interpretation of the data in  
457 Table S2.

## 460 REFERENCES

461 Abeler-Dorner, L., A.G. Laing, A. Lorenc, D.S. Ushakov, S. Clare *et al.*, 2020 High-throughput phenotyping reveals  
462 expansive genetic and structural underpinnings of immune variation. *Nat Immunol* 21 (1):86-100.  
463 Blomberg, O.S., L. Spagnuolo, and K.E. de Visser, 2018 Immune regulation of metastasis: mechanistic insights  
464 and therapeutic opportunities. *Dis Model Mech* 11 (10).



- 465 Boos, M.D., Y. Yokota, G. Eberl, and B.L. Kee, 2007 Mature natural killer cell and lymphoid tissue-inducing cell  
466 development requires Id2-mediated suppression of E protein activity. *J Exp Med* 204 (5):1119-1130.
- 467 Bossan, A., R. Ottman, T. Andl, M.F. Hasan, N. Mahajan *et al.*, 2018 Expression of FGD4 positively correlates with  
468 the aggressive phenotype of prostate cancer. *BMC Cancer* 18 (1):1257.
- 469 Bult, C.J., J.A. Blake, C.L. Smith, J.A. Kadin, J.E. Richardson *et al.*, 2019 Mouse Genome Database (MGD) 2019.  
470 *Nucleic Acids Res* 47 (D1):D801-D806.
- 471 Cantilena, S., F. Pastorino, A. Pezzolo, O. Chayka, V. Pistoia *et al.*, 2011 Frizzled receptor 6 marks rare, highly  
472 tumorigenic stem-like cells in mouse and human neuroblastomas. *Oncotarget* 2 (12):976-983.
- 473 Carrano, N., T. Samaddar, E. Brunialti, L. Franchini, E. Marcello *et al.*, 2019 The Synaptonuclear Messenger  
474 RNF10 Acts as an Architect of Neuronal Morphology. *Mol Neurobiol* 56 (11):7583-7593.
- 475 Chambers, A.F., G.N. Naumov, H.J. Varghese, K.V. Nadkarni, I.C. MacDonald *et al.*, 2001 Critical steps in  
476 hematogenous metastasis: an overview. *Surg Oncol Clin N Am* 10 (2):243-255, vii.
- 477 Corda, G., and A. Sala, 2017 Non-canonical WNT/PCP signalling in cancer: Fzd6 takes centre stage. *Oncogenesis*  
478 6 (7):e364.
- 479 Corda, G., G. Sala, R. Lattanzio, M. Iezzi, M. Salles *et al.*, 2017 Functional and prognostic significance of the  
480 genomic amplification of frizzled 6 (FZD6) in breast cancer. *J Pathol* 241 (3):350-361.
- 481 De Deken, X., and F. Miot, 2019 DUOX Defects and Their Roles in Congenital Hypothyroidism. *Methods Mol Biol*  
482 1982:667-693.
- 483 Delague, V., A. Jacquier, T. Hamadouche, Y. Poitelon, C. Baudot *et al.*, 2007 Mutations in FGD4 encoding the Rho  
484 GDP/GTP exchange factor FRABIN cause autosomal recessive Charcot-Marie-Tooth type 4H. *Am J Hum Genet* 81  
485 (1):1-16.
- 486 Dhyani, A., A.S. Duarte, J.A. Machado-Neto, P. Favaro, M.M. Ortega *et al.*, 2012 ANKHD1 regulates cell cycle  
487 progression and proliferation in multiple myeloma cells. *FEBS Lett* 586 (24):4311-4318.
- 488 Fidler, I.J., and M.L. Kripke, 2015 The challenge of targeting metastasis. *Cancer Metastasis Rev* 34 (4):635-641.
- 489 Filippov, A.K., J. Simon, E.A. Barnard, and D.A. Brown, 2010 The scaffold protein NHERF2 determines the  
490 coupling of P2Y1 nucleotide and mGluR5 glutamate receptor to different ion channels in neurons. *J Neurosci* 30  
491 (33):11068-11072.
- 492 Fragiadaki, M., and M.P. Zeidler, 2018 Ankyrin repeat and single KH domain 1 (ANKHD1) drives renal cancer cell  
493 proliferation via binding to and altering a subset of miRNAs. *J Biol Chem* 293 (25):9570-9579.
- 494 Garcia-Cano, J., A. Martinez-Martinez, J. Sala-Gaston, L. Pedrazza, and J.L. Rosa, 2019 HERCing: Structural and  
495 Functional Relevance of the Large HERC Ubiquitin Ligases. *Front Physiol* 10:1014.
- 496 Grasberger, H., and S. Refetoff, 2006 Identification of the maturation factor for dual oxidase. Evolution of an  
497 eukaryotic operon equivalent. *J Biol Chem* 281 (27):18269-18272.
- 498 Guerrero, J.A., C. Bennett, L. van der Weyden, H. McKinney, M. Chin *et al.*, 2014 Gray platelet syndrome:  
499 proinflammatory megakaryocytes and alpha-granule loss cause myelofibrosis and confer metastasis resistance in  
500 mice. *Blood* 124 (24):3624-3635.
- 501 Honda, K., H. Yanai, H. Negishi, M. Asagiri, M. Sato *et al.*, 2005 IRF-7 is the master regulator of type-I interferon-  
502 dependent immune responses. *Nature* 434 (7034):772-777.
- 503 Hoshikawa, S., T. Ogata, S. Fujiwara, K. Nakamura, and S. Tanaka, 2008 A novel function of RING finger protein  
504 10 in transcriptional regulation of the myelin-associated glycoprotein gene and myelin formation in Schwann cells.  
505 *PLoS One* 3 (10):e3464.
- 506 Hryciw, D.H., K.A. Jenkin, A.C. Simcocks, E. Grinfeld, A.J. McAinch *et al.*, 2012 The interaction between megalin  
507 and CIC-5 is scaffolded by the Na(+)-H(+) exchanger regulatory factor 2 (NHERF2) in proximal tubule cells. *Int J*  
508 *Biochem Cell Biol* 44 (5):815-823.
- 509 Huang, K., A.K. Nair, Y.L. Muller, P. Piaggi, L. Bian *et al.*, 2014 Whole exome sequencing identifies variation in  
510 CYB5A and RNF10 associated with adiposity and type 2 diabetes. *Obesity (Silver Spring)* 22 (4):984-988.
- 511 Huang, T., A.A. Alvarez, R.P. Pangen, C.M. Horbinski, S. Lu *et al.*, 2016 A regulatory circuit of miR-125b/miR-20b  
512 and Wnt signalling controls glioblastoma phenotypes through FZD6-modulated pathways. *Nat Commun* 7:12885.
- 513 Ikushima, H., H. Negishi, and T. Taniguchi, 2013 The IRF family transcription factors at the interface of innate and  
514 adaptive immune responses. *Cold Spring Harb Symp Quant Biol* 78:105-116.
- 515 Kang, B.H., M. Tavecchio, H.L. Goel, C.C. Hsieh, D.S. Garlick *et al.*, 2011 Targeted inhibition of mitochondrial  
516 Hsp90 suppresses localised and metastatic prostate cancer growth in a genetic mouse model of disease. *Br J*  
517 *Cancer* 104 (4):629-634.
- 518 Kim, N.G., and B.M. Gumbiner, 2019 Cell contact and Nf2/Merlin-dependent regulation of TEAD palmitoylation and  
519 activity. *Proc Natl Acad Sci U S A* 116 (20):9877-9882.
- 520 Kitamura, D., J. Roes, R. Kuhn, and K. Rajewsky, 1991 A B cell-deficient mouse by targeted disruption of the  
521 membrane exon of the immunoglobulin mu chain gene. *Nature* 350 (6317):423-426.
- 522 Leach, D.R., M.F. Krummel, and J.P. Allison, 1996 Enhancement of antitumor immunity by CTLA-4 blockade.  
523 *Science* 271 (5256):1734-1736.
- 524 Li, J., J. Soroka, and J. Buchner, 2012 The Hsp90 chaperone machinery: conformational dynamics and regulation  
525 by co-chaperones. *Biochim Biophys Acta* 1823 (3):624-635.
- 526 Li, L., M. Peng, W. Xue, Z. Fan, T. Wang *et al.*, 2018 Integrated analysis of dysregulated long non-coding  
527 RNAs/microRNAs/mRNAs in metastasis of lung adenocarcinoma. *J Transl Med* 16 (1):372.



- 528 Li, S., G. Yu, F. Jing, H. Chen, A. Liu *et al.*, 2019 RING finger protein 10 attenuates vascular restenosis by  
529 inhibiting vascular smooth muscle cell hyperproliferation in vivo and vitro. *IUBMB Life* 71 (5):632-642.
- 530 Liao, X., K. Huang, R. Huang, X. Liu, C. Han *et al.*, 2017 Genome-scale analysis to identify prognostic markers in  
531 patients with early-stage pancreatic ductal adenocarcinoma after pancreaticoduodenectomy. *Onco Targets Ther*  
532 10:4493-4506.
- 533 Lin, D.T., and E. Conibear, 2015 ABHD17 proteins are novel protein depalmitoylases that regulate N-Ras palmitate  
534 turnover and subcellular localization. *Elife* 4:e11306.
- 535 Liu, S., J.F. Wiggins, T. Sreenath, A.B. Kulkarni, J.M. Ward *et al.*, 2006 Dph3, a small protein required for  
536 diphthamide biosynthesis, is essential in mouse development. *Mol Cell Biol* 26 (10):3835-3841.
- 537 Machado-Neto, J.A., M. Lazarini, P. Favaro, G.C. Franchi, Jr., A.E. Nowill *et al.*, 2014 ANKHD1, a novel component  
538 of the Hippo signaling pathway, promotes YAP1 activation and cell cycle progression in prostate cancer cells. *Exp*  
539 *Cell Res* 324 (2):137-145.
- 540 Malik, Y.S., M.A. Sheikh, M. Lai, R. Cao, and X. Zhu, 2013 RING finger protein 10 regulates retinoic acid-induced  
541 neuronal differentiation and the cell cycle exit of P19 embryonic carcinoma cells. *J Cell Biochem* 114 (9):2007-  
542 2015.
- 543 Mao, X., and J. Tong, 2018 ARHGAP30 suppressed lung cancer cell proliferation, migration, and invasion through  
544 inhibition of the Wnt/beta-catenin signaling pathway. *Onco Targets Ther* 11:7447-7457.
- 545 Mashimo, T., O. Hadjebi, F. Amair-Pinedo, T. Tsurumi, F. Langa *et al.*, 2009 Progressive Purkinje cell degeneration  
546 in tambaleante mutant mice is a consequence of a missense mutation in HERC1 E3 ubiquitin ligase. *PLoS Genet* 5  
547 (12):e1000784.
- 548 Mastroeni, P., C. Simmons, R. Fowler, C.E. Hormaeche, and G. Dougan, 2000 Igh-6(-/-) (B-cell-deficient) mice fail  
549 to mount solid acquired resistance to oral challenge with virulent *Salmonella enterica* serovar typhimurium and  
550 show impaired Th1 T-cell responses to *Salmonella* antigens. *Infect Immun* 68 (1):46-53.
- 551 Meehan, T.F., N. Conte, D.B. West, J.O. Jacobsen, J. Mason *et al.*, 2017 Disease model discovery from 3,328  
552 gene knockouts by The International Mouse Phenotyping Consortium. *Nat Genet* 49 (8):1231-1238.
- 553 Motenko, H., S.B. Neuhauser, M. O'Keefe, and J.E. Richardson, 2015 MouseMine: a new data warehouse for MGI.  
554 *Mamm Genome* 26 (7-8):325-330.
- 555 Naji, L., D. Pacholsky, and P. Aspenstrom, 2011 ARHGAP30 is a Wrch-1-interacting protein involved in actin  
556 dynamics and cell adhesion. *Biochem Biophys Res Commun* 409 (1):96-102.
- 557 Nakanishi, H., and Y. Takai, 2008 Frabin and other related Cdc42-specific guanine nucleotide exchange factors  
558 couple the actin cytoskeleton with the plasma membrane. *J Cell Mol Med* 12 (4):1169-1176.
- 559 Penninger, J.M., C. Sirard, H.W. Mittrucker, A. Chidgey, I. Kozieradzki *et al.*, 1997 The interferon regulatory  
560 transcription factor IRF-1 controls positive and negative selection of CD8+ thymocytes. *Immunity* 7 (2):243-254.
- 561 Quail, D.F., and J.A. Joyce, 2013 Microenvironmental regulation of tumor progression and metastasis. *Nat Med* 19  
562 (11):1423-1437.
- 563 Roychoudhuri, R., K. Hirahara, K. Mousavi, D. Clever, C.A. Klebanoff *et al.*, 2013 BACH2 represses effector  
564 programs to stabilize T(reg)-mediated immune homeostasis. *Nature* 498 (7455):506-510.
- 565 Sasaki, T., J. Irie-Sasaki, R.G. Jones, A.J. Oliveira-dos-Santos, W.L. Stanford *et al.*, 2000 Function of PI3Kgamma  
566 in thymocyte development, T cell activation, and neutrophil migration. *Science* 287 (5455):1040-1046.
- 567 Schaffrath, R., W. Abdel-Fattah, R. Klassen, and M.J. Stark, 2014 The diphthamide modification pathway from  
568 *Saccharomyces cerevisiae*--revisited. *Mol Microbiol* 94 (6):1213-1226.
- 569 Shahid, M., T.B. George, J. Saller, M. Haija, Z. Sayegh *et al.*, 2019 FGD4 (Frabin) Overexpression in Pancreatic  
570 Neuroendocrine Neoplasms. *Pancreas* 48 (10):1307-1311.
- 571 Speak, A.O., A. Swiatkowska, N.A. Karp, M.J. Arends, D.J. Adams *et al.*, 2017 A high-throughput in vivo screening  
572 method in the mouse for identifying regulators of metastatic colonization. *Nat Protoc* 12 (12):2465-2477.
- 573 Stagg, J., and M.J. Smyth, 2010 Extracellular adenosine triphosphate and adenosine in cancer. *Oncogene* 29  
574 (39):5346-5358.
- 575 Sun, X., Y. Wu, W. Gao, K. Enyoji, E. Csizmadia *et al.*, 2010 CD39/ENTPD1 expression by CD4+Foxp3+  
576 regulatory T cells promotes hepatic metastatic tumor growth in mice. *Gastroenterology* 139 (3):1030-1040.
- 577 Takeda, A.J., T.J. Maher, Y. Zhang, S.M. Lanahan, M.L. Bucklin *et al.*, 2019 Human PI3Kgamma deficiency and its  
578 microbiota-dependent mouse model reveal immunodeficiency and tissue immunopathology. *Nat Commun* 10  
579 (1):4364.
- 580 Taki, S., T. Sato, K. Ogasawara, T. Fukuda, M. Sato *et al.*, 1997 Multistage regulation of Th1-type immune  
581 responses by the transcription factor IRF-1. *Immunity* 6 (6):673-679.
- 582 Talmadge, J.E., and I.J. Fidler, 2010 AACR centennial series: the biology of cancer metastasis: historical  
583 perspective. *Cancer Res* 70 (14):5649-5669.
- 584 Thomas, D.C., S. Clare, J.M. Sowerby, M. Pardo, J.K. Juss *et al.*, 2017 Eros is a novel transmembrane protein that  
585 controls the phagocyte respiratory burst and is essential for innate immunity. *J Exp Med* 214 (4):1111-1128.
- 586 Ugrinovic, S., N. Menager, N. Goh, and P. Mastroeni, 2003 Characterization and development of T-Cell immune  
587 responses in B-cell-deficient (Igh-6(-/-)) mice with *Salmonella enterica* serovar Typhimurium infection. *Infect Immun*  
588 71 (12):6808-6819.
- 589 Uthman, S., C. Bar, V. Scheidt, S. Liu, S. ten Have *et al.*, 2013 The amidation step of diphthamide biosynthesis in  
590 yeast requires DPH6, a gene identified through mining the DPH1-DPH5 interaction network. *PLoS Genet* 9  
591 (2):e1003334.

592 van der Weyden, L., M.J. Arends, A.D. Campbell, T. Bald, H. Wardle-Jones *et al.*, 2017a Genome-wide in vivo  
593 screen identifies novel host regulators of metastatic colonization. *Nature* 541 (7636):233-236.  
594 van der Weyden, L., N.A. Karp, A. Swiatkowska, D.J. Adams, and A.O. Speak, 2017b Genome wide in vivo mouse  
595 screen data from studies to assess host regulation of metastatic colonisation. *Sci Data* 4:170129.  
596 van der Weyden, L., A.O. Speak, A. Swiatkowska, S. Clare, A. Schejtmann *et al.*, 2018 Pulmonary metastatic  
597 colonisation and granulomas in NOX2-deficient mice. *J Pathol* 246 (3):300-310.  
598 Wang, J., J. Qian, Y. Hu, X. Kong, H. Chen *et al.*, 2014 ArhGAP30 promotes p53 acetylation and function in  
599 colorectal cancer. *Nat Commun* 5:4735.  
600 Webb, T.R., S.H. Cross, L. McKie, R. Edgar, L. Vizor *et al.*, 2008 Diphthamide modification of eEF2 requires a J-  
601 domain protein and is essential for normal development. *J Cell Sci* 121 (Pt 19):3140-3145.  
602 Wilk, E., A.K. Pandey, S.R. Leist, B. Hatesuer, M. Preusse *et al.*, 2015 RNAseq expression analysis of resistant  
603 and susceptible mice after influenza A virus infection identifies novel genes associated with virus replication and  
604 important for host resistance to infection. *BMC Genomics* 16:655.  
605 Yokoi, N., Y. Fukata, A. Sekiya, T. Murakami, K. Kobayashi *et al.*, 2016 Identification of PSD-95 Depalmitoylating  
606 Enzymes. *J Neurosci* 36 (24):6431-6444.  
607 Yokota, Y., A. Mansouri, S. Mori, S. Sugawara, S. Adachi *et al.*, 1999 Development of peripheral lymphoid organs  
608 and natural killer cells depends on the helix-loop-helix inhibitor Id2. *Nature* 397 (6721):702-706.  
609 Yu, Y.R., L.R. You, Y.T. Yan, and C.M. Chen, 2014 Role of OVCA1/DPH1 in craniofacial abnormalities of Miller-  
610 Dieker syndrome. *Hum Mol Genet* 23 (21):5579-5596.  
611 Zago, G., M. Muller, M. van den Heuvel, and P. Baas, 2016 New targeted treatments for non-small-cell lung cancer  
612 - role of nivolumab. *Biologics* 10:103-117.  
613 Zhang, J., J.L. Wang, C.Y. Zhang, Y.F. Ma, R. Zhao *et al.*, 2019 The prognostic role of FZD6 in esophageal  
614 squamous cell carcinoma patients. *Clin Transl Oncol*.  
615 Zhang, W., Z. Zhang, Y. Zhang, and A.P. Naren, 2017 CFTR-NHERF2-LPA(2) Complex in the Airway and Gut  
616 Epithelia. *Int J Mol Sci* 18 (9).  
617 Zhou, Z., H. Jiang, K. Tu, W. Yu, J. Zhang *et al.*, 2019 ANKHD1 is required for SMYD3 to promote tumor  
618 metastasis in hepatocellular carcinoma. *J Exp Clin Cancer Res* 38 (1):18.  
619

**Table 1.** Results of the Integrative Data Analysis showing mutant mouse lines with statistically significant decreased or increased pulmonary metastatic colonisation (using a statistical threshold of  $P < 0.0005$  and a biological threshold of genotype estimate  $\leq -55$  or  $\geq +55$ ). The genotype of the mutant mice listed were all homozygotes except *Id2*, which were heterozygotes. 'Cohorts' was the number of individual cohorts that were tested for this particular mouse line. 'Genotype estimate' is the alteration in number of pulmonary metastatic colonies for that mutant mouse line relative to control mice. P value is the Hochberg test. \* The mutant mice (and controls) were administered 1/10th dose of other lines. \*\* The genotype estimate is an average of the values obtained for both sexes (as there was a sex effect observed); the values for each sex are:  $290 \pm 26$  (male) and  $153 \pm 31$  (female).

| GENE            | ALLELE                  | COHORTS | GENOTYPE ESTIMATE | P VALUE  |
|-----------------|-------------------------|---------|-------------------|----------|
| <i>Duoxa2</i> * | <tm1b(KOMP)Wtsi>        | 5       | +721 ± 21         | 2.02E-15 |
| <i>Irf1</i>     | <tm1a(EUCOMM)Wtsi>      | 4       | +246 ± 32         | 1.12E-04 |
| <i>Rnf10</i> ** | <tm1b(KOMP)Wtsi>        | 5       | +221 ± 28         | 1.74E-08 |
| <i>Pik3cg</i>   | <tm1a(EUCOMM)Wtsi>      | 6       | +198 ± 14         | 7.20E-12 |
| <i>Herc1</i>    | <em1Wtsi>               | 4       | +178 ± 27         | 2.75E-04 |
| <i>Arhgap30</i> | <tm1a(EUCOMM)Wtsi>      | 5       | +178 ± 11         | 2.25E-31 |
| <i>Dph6</i>     | <tm1a(KOMP)Wtsi>        | 5       | +141 ± 13         | 7.94E-17 |
| <i>Slc9a3r2</i> | <tm1a(EUCOMM)Wtsi>      | 6       | +141 ± 20         | 2.11E-05 |
| <i>Igh-6</i>    | <tm1(Cgn)>              | 6       | +101 ± 13         | 6.78E-08 |
| <i>Abhd17a</i>  | <tm1a(KOMP)Wtsi>        | 6       | +96 ± 11          | 1.99E-08 |
| <i>Irf7</i>     | <tm1(KOMP)Wtsi>         | 6       | +92 ± 16          | 5.39E-05 |
| <i>Id2</i>      | <tm2b(EUCOMM)Wtsi>      | 6       | +89 ± 11          | 4.91E-12 |
| <i>Fgd4</i>     | <tm1a(EUCOMM)Wtsi>      | 4       | +89 ± 15          | 1.15E-03 |
| <i>Ankhd1</i>   | <tm1b(KOMP)Wtsi>        | 5       | +60 ± 10          | 1.68E-06 |
| <i>Fzd6</i>     | <tm2a(EUCOMM)Wtsi>      | 6       | +59 ± 10          | 7.70E-07 |
| <i>Grsf1</i>    | <tm1b(EUCOMM)Wtsi>      | 7       | -55 ± 5           | 6.36E-12 |
| <i>Ncf4</i>     | <tm2Pth>                | 8       | -61 ± 9           | 3.84E-08 |
| <i>Mier1</i>    | <tm1a(EUCOMM)Wtsi>      | 3       | -63 ± 13          | 5.02E-04 |
| <i>Cybc1</i>    | <tm1a(KOMP)Wtsi>        | 11      | -67 ± 11          | 1.79E-06 |
| <i>Abraxas2</i> | <tm1a(EUCOMM)Wtsi>      | 3       | -67 ± 11          | 4.42E-04 |
| <i>Rwdd1</i>    | <tm1b(KOMP)Wtsi>        | 9       | -70 ± 8           | 1.79E-14 |
| <i>Cybb</i>     | <tm1Din>                | 6       | -71 ± 8           | 2.76E-12 |
| <i>Bach2</i>    | <tm1a(EUCOMM)Wtsi>      | 6       | -71 ± 7           | 7.12E-10 |
| <i>Ncf1</i>     | <m1J>                   | 3       | -74 ± 10          | 8.51E-06 |
| <i>Ncf2</i>     | <tm1a(EUCOMM)Wtsi>      | 6       | -77 ± 6           | 5.99E-13 |
| <i>Lrig1</i>    | <tm1a(EUCOMM)Wtsi>      | 5       | -92 ± 10          | 2.53E-13 |
| <i>Cyba</i>     | <tm1a(EUCOMM)Wtsi>      | 6       | -99 ± 6           | 1.18E-17 |
| <i>Arhgef1</i>  | <tm1a(EUCOMM)Wtsi>      | 6       | -100 ± 6          | 7.03E-14 |
| <i>Fbxo7</i>    | <tm1a(EUCOMM)Wtsi>      | 4       | -100 ± 15         | 7.63E-08 |
| <i>Tbc1d22a</i> | <tm1b(KOMP)Wtsi>        | 6       | -102 ± 9          | 5.12E-22 |
| <i>Hsp90aa1</i> | <tm1(KOMP)Wtsi>         | 3       | -103 ± 13         | 6.37E-06 |
| <i>Entpd1</i>   | <tm1a(EUCOMM)Wtsi/Hmgu> | 4       | -106 ± 16         | 9.13E-08 |
| <i>Nbeal2</i>   | <tm1a(EUCOMM)Wtsi>      | 4       | -124 ± 14         | 9.79E-09 |
| <i>Spns2</i>    | <tm1a(KOMP)Wtsi>        | 10      | -160 ± 6          | 2.81E-37 |

**Figure 1**

**A**

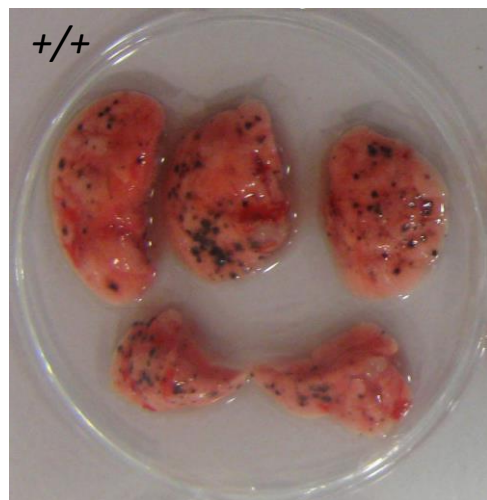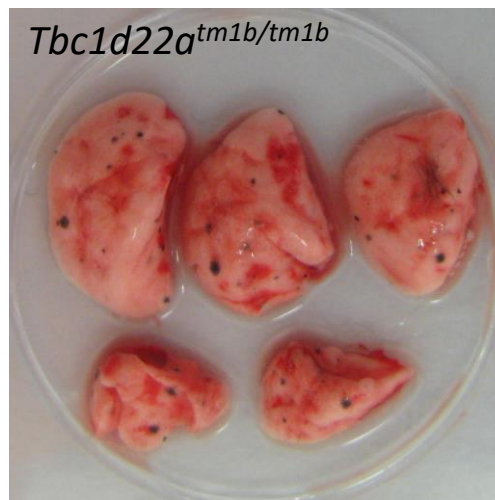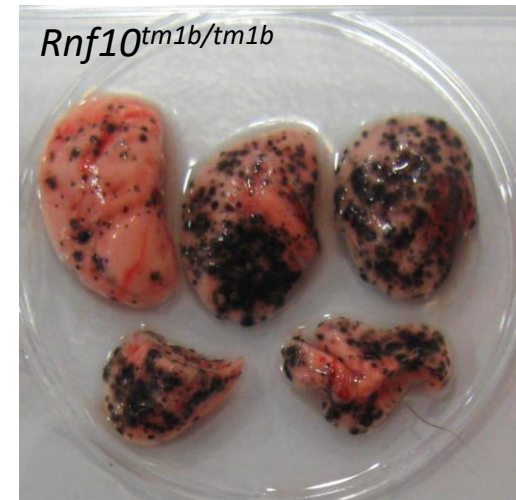

**B**

Wildtype mice  
(+/+)

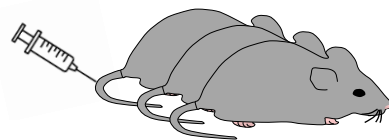

Mutant mice  
(gene A)

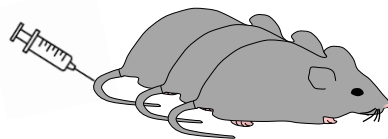

Mutant mice  
(gene B)

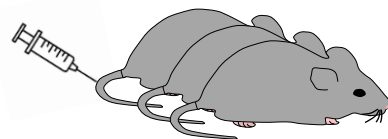

10 days

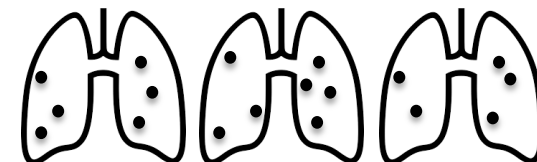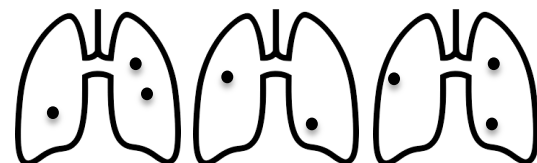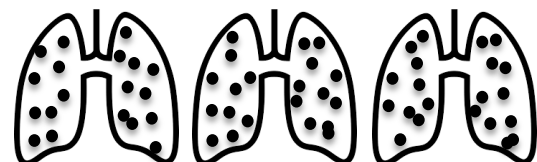

**Figure 2**

**A**

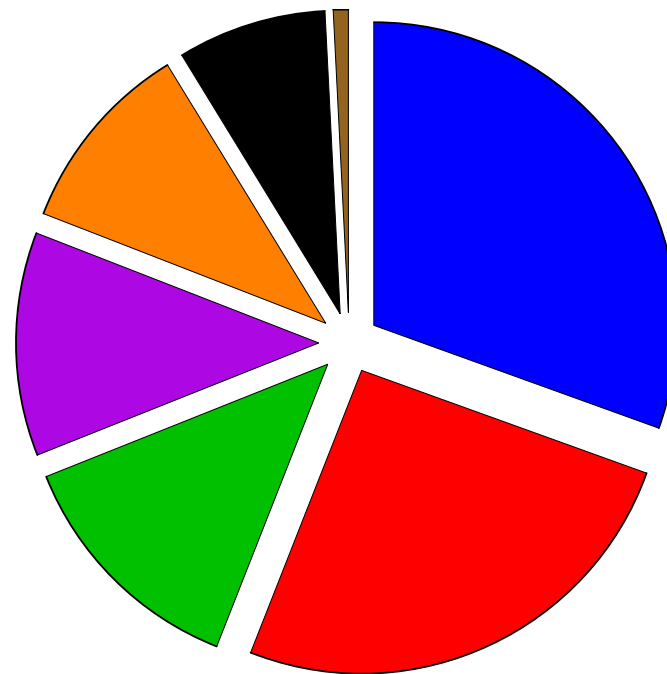

- 30.50% nucleic acid binding activity
- 25.46% signal transduction activity
- 13.00% enzyme regulator activity
- 11.94% cytoskeletal activity
- 10.34% kinase activity
- 7.96% transporter activity
- 0.80% translation activity

**B**

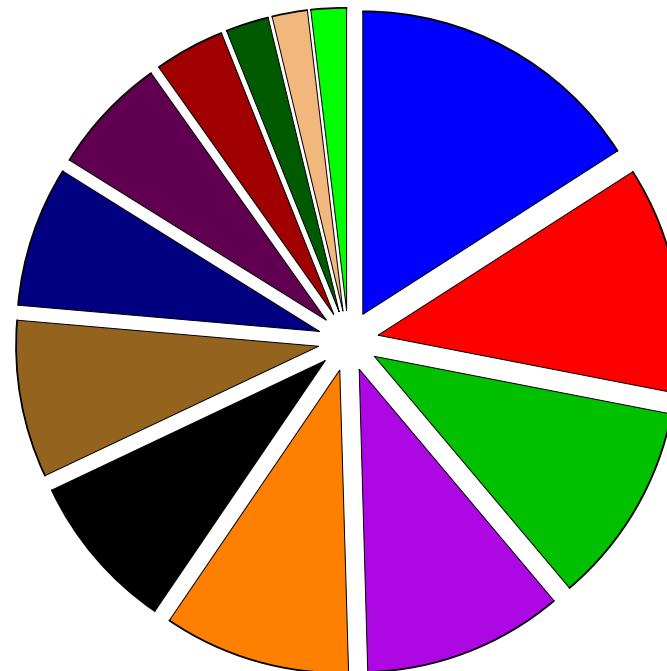

- 15.94% cell organization and biogenesis
- 12.12% protein metabolism
- 10.79% developmental processes
- 10.69% RNA metabolism
- 9.98% signal transduction
- 8.45% transport
- 8.40% stress response
- 7.48% other metabolic processes
- 6.31% cell cycle and proliferation
- 3.77% death
- 2.29% DNA metabolism
- 1.88% cell adhesion
- 1.88% cell-cell signaling
